# Supplementary material for: A Snapshot of Histone Modifications within Transposable Elements in Drosophila Wild Type Strains
Source: PubMed Central journal article supplement (PMC3433462; doi:10.1371/journal.pone.0044253), 2012-09-04

**A**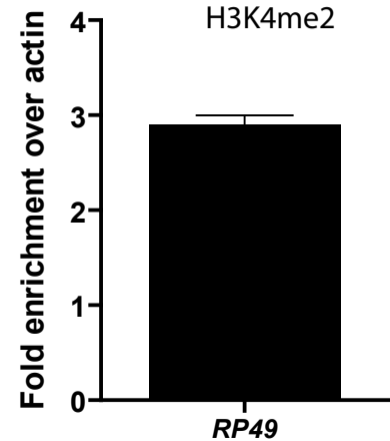**B**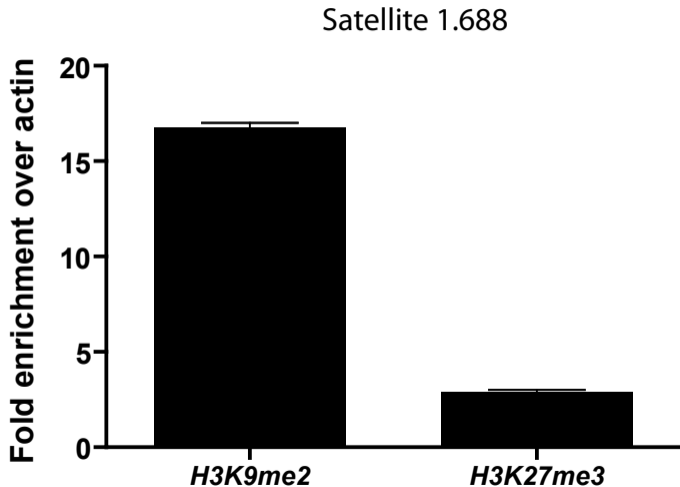

Supplement: pone.0044253.s002.pdf [file pone.0044253.s002.pdf]
