# Supplementary material for: A Snapshot of Histone Modifications within Transposable Elements in Drosophila Wild Type Strains
Source: PubMed Central journal article supplement (PMC3433462; doi:10.1371/journal.pone.0044253), 2012-09-04

# RNA steady-state level / copy number

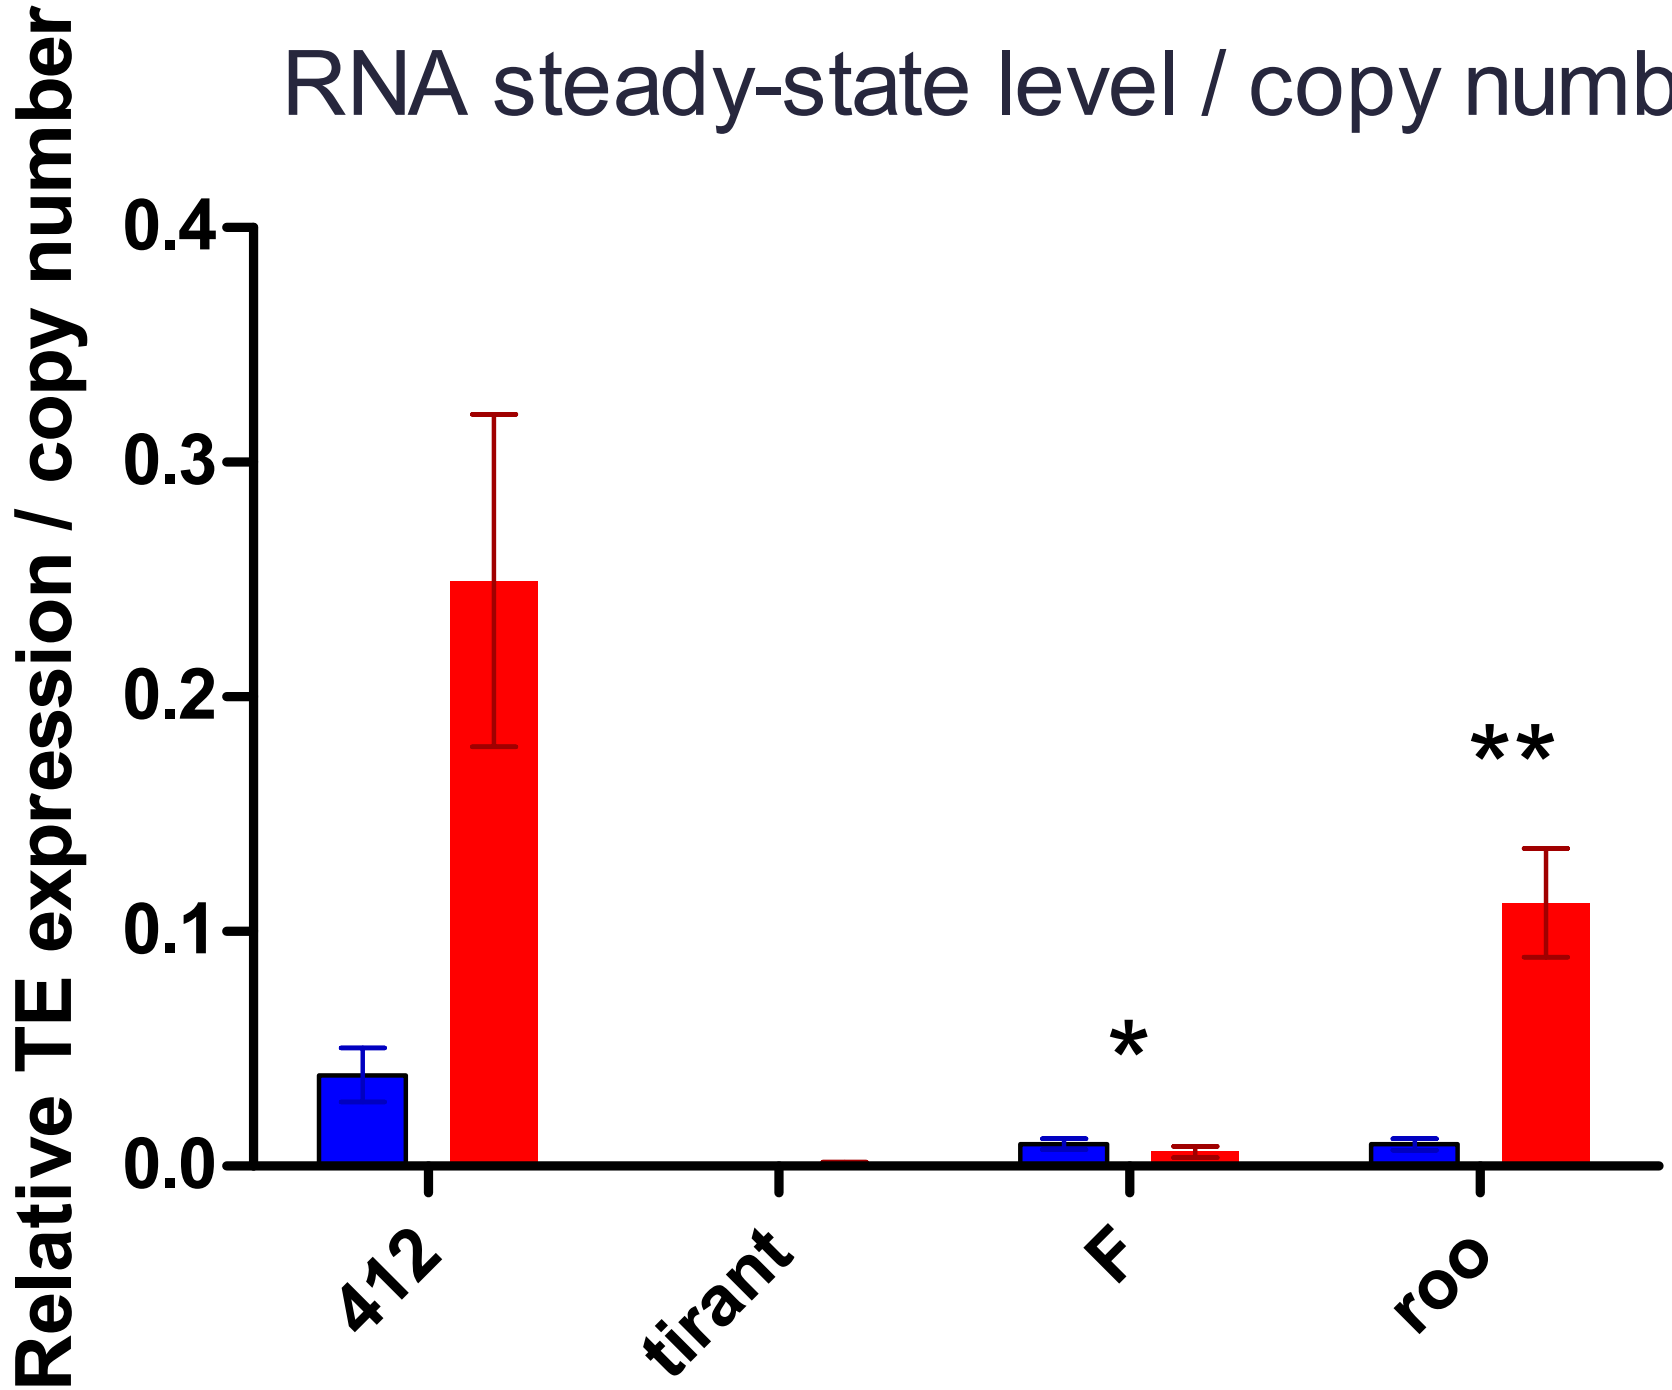

Supplement: pone.0044253.s005.pdf [file pone.0044253.s005.pdf]
